# Supplementary material for: The conservation and functionality of the oxygen-sensing enzyme Factor Inhibiting HIF (FIH) in non-vertebrates
Source: PubMed Central journal article supplement (PMC6488082; doi:10.1371/journal.pone.0216134), 2019-04-29
Supplement: pone.0216134.s006.pdf [file pone.0216134.s006.pdf]

# Supplementary File 1

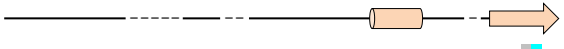

|                         |     |                                                          |                                 |
|-------------------------|-----|----------------------------------------------------------|---------------------------------|
| <i>P. brassicae</i>     | 1   | -----MLWAKRS-----DRSV                                    | EVD                             |
| <i>E. huxleyi</i>       | 306 | -----SPPAWPA-----H-----                                  | YRPTAHE                         |
| <i>B. natans</i>        | 74  | -----PKRYKESLETRPSDDTLDSYR-----                          | NLRPVCVV                        |
| <i>G. theta</i>         | 1   | -----MACVP-----                                          | PFPCQPVQR                       |
| <i>Chrysochromulina</i> | 138 | -----DPHAWPEV-----PSAAEHLPPDCFRSVHCAPMRSV                | PRC                             |
| <i>C. owczarzaki</i>    | 1   | MDQVASHISQQTIERGRLRLPGV-----SSPVVNCRLQVY-ATQPT           | IPRY                            |
| <i>O. cincta</i>        | 1   | -----MSETPFRDCLGGPGTP-----VPQPLNNGTGHYDGGDTHNYNI-        | ITGNVPCY                        |
| <i>S. rosetta</i>       | 1   | -----MSGGGEW-----                                        | WQCPC-PLESVPRV                  |
| <i>L. anatina</i>       | 1   | -----MAT--AEVPSDG-----                                   | RKPHEKESGYTSMDFLYF- DTEDIPCL    |
| <i>C. gigas</i>         | 1   | -----MAKE-----                                           | KKNFDLKEYPT- STEEIPRL           |
| <i>L. gigantea</i>      | 1   | -----MATSVERSPESEG-----                                  | EDAYS-----TIRGELKQYST- QTEPVPRL |
| <i>A. queenslandica</i> | 1   | -----MAEPKGPSSSKIEMKKYST- PPKPT                          | QRL                             |
| <i>A. aurita</i>        | 1   | -----MEDSPRSANKTPDYCLIDGHRVRYNYNI- KTTEI                 | IPRL                            |
| <i>C. intestinalis</i>  | 1   | -----MAVFASGSYDPDSITKYSS- ITEQI                          | IPRR                            |
| <i>N. vectensis</i>     | 1   | -----MAAVSDLYTDLDGHLVRKYSL- DWIQV                        | PRL                             |
| <i>A. millepora</i>     | 1   | -----MASV--VSDKRGTYVDLEGHKVRKYD- LQLLSKI                 | IPRL                            |
| <i>S. purpuratus</i>    | 1   | -----ASSASECGTSK--ADQNTKCRIDLDPLQHRKYTF- PSEQI           | IPRL                            |
| <i>O. bimaculoides</i>  | 1   | -----MAAEAGDPHRYK- PLSKV                                 | PRL                             |
| <i>D. citri</i>         | 1   | -----MA-----                                             | ESSQTDSDGKSSTDGFRKYNI- PLEOVPRL |
| <i>T. cancriformis</i>  | 1   | -----MESGEISSPAKKIPGLKYTF- IEQKV                         | EIC                             |
| <i>C. teleta</i>        | 1   | -----MATVEGGTDGWDENQLRKYTF- PTTQL                        | QRM                             |
| <i>A. pisum</i>         | 1   | -----MAGWNESQLRKYNI- KVDKI                               | PTL                             |
| <i>H. sapiens</i>       | 1   | -----MAATAAEAVASG----SGEP--REEAGALGPAWDESQLRSYST- PTRPI  | IPRL                            |
| <i>B. floridae</i>      | 1   | -----MAGAEGWSSAQLRQYST- PLETI                            | IPRL                            |
| <i>F. occidentalis</i>  | 1   | -----MSTRNEPQCNLRYKDT- PLDDI                             | IPRL                            |
| <i>C. aquilonaris</i>   | 1   | -----MATAIGNGW--GDQKDYGT- PTVPI                          | PRM                             |
| <i>I. scapularis</i>    | 1   | -----M--AQSECEGCTGCSSLDFOQYGT- PLEAV                     | PRL                             |
| <i>A. geniculata</i>    | 1   | -----MADSKYHFRRYNI- PVEPI                                | PVL                             |
| <i>C. sculpturatus</i>  | 1   | -----MASPQTELSYDT- PLEPI                                 | IPRL                            |
| <i>S. olivacea</i>      | 1   | -----MEESV--EHKQHVVNHNHTAHLKQYF- PTEHV                   | PRL                             |
| <i>T. castaneum</i>     | 1   | -----MDGDKKPWDPSQLRKYDL- NLEEI                           | IPRL                            |
| <i>S. maritima</i>      | 1   | -----MAVSESKVAFRQYD- PKOSI                               | IPRL                            |
| <i>E. danica</i>        | 1   | -----MAYAP--YLMASEKRGWHPDQLRKYDL- NLEEI                  | IPRL                            |
| <i>R. prolixus</i>      | 1   | -----VMDQERRVWDETQLRKYDI- S LKSV                         | PKY                             |
| <i>P. humanus</i>       | 1   | -----MAENNEKNWQSQLRKYNI- QCDQI                           | IPRL                            |
| <i>C. pallens</i>       | 1   | -----MKMAQNNIEWNNENQLRKYD- ILEDI                         | IPRL                            |
| <i>Z. nevadensis</i>    | 1   | -----MADKKEWDQSQLRKYDI- QLDEI                            | IPRL                            |
| <i>T. commodus</i>      | 1   | -----MRRRAAPHILRGPPVESSTVR--TGTKMAQKRGYDASQLRKYDI- QLEEI | IPRL                            |

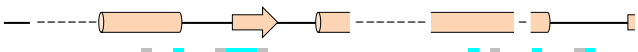

|                         |     |                                             |                       |
|-------------------------|-----|---------------------------------------------|-----------------------|
| <i>P. brassicae</i>     | 14  | DV---AADVV DAGDAATQADR PVVVDGLAS-----RAGD   | MTVAK--LDAIGDVQV      |
| <i>E. huxleyi</i>       | 321 | PFQDGGQATLDTLARYEADQPVVLTGADIVDV-----       | ERSSDNAKVEALLGDKAV    |
| <i>B. natans</i>        | 103 | PWG---SFLLDQFLAEHLPIVIRGSQLIKRGGSTGESKESKWT | TPGH-QOSMLAAKV        |
| <i>G. theta</i>         | 16  | SFD---DPAVIDFLRREEPVILSNVSLVLRP-----        | LVGKKNVDY--LKEIFPMISS |
| <i>Chrysochromulina</i> | 172 | PFQ---SKAARALLEQRKPVILTHHTLVGG-----         | AASKWTLDY-LCQQMGLPC   |
| <i>C. owczarzaki</i>    | 43  | RAT---DDAARLALRSKTFVILDSIAAP-----           | AVERWDLEF-LKHLGMSN    |
| <i>O. cincta</i>        | 48  | DFN---DFVALNLKEQVPVILKGADLVSS-----          | A-MKWDLDY--LSTHIGGGRF |
| <i>S. rosetta</i>       | 21  | RVC---DPKLLDFIREQRPVITDLSKLVES-----         | A-RHWDLEY-MEKHMGDCKF  |
| <i>L. anatina</i>       | 40  | NAST---QSSKVDQFIASERPVLMNTDLDVKT-----       | A-LHWDLNY-LEQHLGDGDF  |
| <i>C. gigas</i>         | 24  | NID---NPETEKRIAAGLPVITDLSGLVRS-----         | A-LHWDLDY--LQGNIGDGF  |
| <i>L. gigantea</i>      | 37  | NHL---DPRVEALMRAEKPVVITDNLVKS-----          | A-FHWDAFY-LSSNIGSAKO  |
| <i>A. queenslandica</i> | 29  | CWT---EATADHLMTHEEPVVLTDLDVQS-----          | A-LHWDLSY-LEQNMGPAKH  |
| <i>A. aurita</i>        | 37  | NFN---DPEAAELISSQKPVVLTGTLNLEP-----         | A-LHWNLEY-LRDNIGDGN   |
| <i>C. intestinalis</i>  | 28  | SIQ---DPETYQLIKDSKPVVITDNLVTS-----          | A-SKWDLEY-LNKNLGDGLF  |
| <i>N. vectensis</i>     | 30  | HYQ---DBKATELIKNECPVVLTDSDIIS-----          | A-MKWDIEY-LRENIGDGF   |
| <i>A. millepora</i>     | 35  | EYD---DPNVESIANEPPVLLVNSNISS-----           | A-LKWDLDY-LKKNLGAQSF  |
| <i>S. purpuratus</i>    | 41  | DVS---DPKVSEYVRDGKPVVITGTLNLET-----         | A-LKWDLDY-LEKNLGSQKF  |
| <i>O. bimaculoides</i>  | 23  | PYD---DPQAQRLLISAEQPVVLTGSDLVDS-----        | A-LHWNLDY-LSDNMANTQF  |
| <i>D. citri</i>         | 32  | SFD---DPRVDEYIGDMKPVVITGSLNLIQS-----        | A-MKWDLEY-LESHMPSNLF  |
| <i>T. cancriformis</i>  | 30  | DAC---DPEALNLSIKQFPVVLIRNTRLIDS-----        | A-LHWDIEY-LERHAGSSDF  |
| <i>C. teleta</i>        | 30  | SCK---DPRLNDVIAREEPVLTDCNCLASS-----         | A-SHWSLEY-LSSNIGNGTF  |
| <i>A. pisum</i>         | 23  | QYD---DPKVDLSLSSNNKPVVILKGSKLVSQ-----       | V-LKWDLDY-LAEHMNSICC  |
| <i>H. sapiens</i>       | 46  | SQS---DRAEELIENEPPVLTDTNLVYP-----           | A-LKWDLEY-LQENIGNGDF  |
| <i>B. floridae</i>      | 26  | SCT---DPEADRLISEEKPVVLTDTHLIDS-----         | A-LKWDLDY-LRANLGGGLC  |
| <i>F. occidentalis</i>  | 27  | NCM---DPQVDELIKSKKPVVLTGSLNLVGA-----        | A-SKWDLDY-LEKNMNGDGF  |
| <i>C. aquilonaris</i>   | 26  | SCH---DPEAQRRIAMQPVVLTDTNLVTS-----          | A-LKWDLDY-LESNIGGGDY  |
| <i>I. scapularis</i>    | 31  | SHT---DPEADRLIANMMPVLTDTGLVAP-----          | A-LKWDLDY-LESHLGGGSC  |
| <i>A. geniculata</i>    | 22  | SPS---DPEAEHLIASMKPVVILKNTNLVSS-----        | A-LKWDLDY-LEANIGDGVF  |
| <i>C. sculpturatus</i>  | 22  | SCL---DPNADALLENMKPVVLTDTNLVSS-----         | A-LKWNLDY-LQKNLGDGSE  |
| <i>S. olivacea</i>      | 35  | SAS---DPLASQLIAEEKPVVLTDTNLCDT-----         | A-LKWDLDY-LAQHMGSERY  |
| <i>T. castaneum</i>     | 27  | HYK---DPKIDEYIKENKPVVITENIIVKP-----         | AVQRWSLEY-LERNLGHSGH  |
| <i>S. maritima</i>      | 24  | SIF---DPEADKLISEERPVLITDNLIRP-----          | A-LKWDLEY-LESHLGPQNY  |
| <i>E. danica</i>        | 35  | EYS---DARVDEFIAKDRPVVITGTCVLVAP-----        | A-AKWTLEY-LAHNIGGGEF  |
| <i>R. prolixus</i>      | 28  | KVS---DPKVEELIAARKPVVITVDSLDVAP-----        | S-TKWDLNY-LQEHMGSSTNC |
| <i>P. humanus</i>       | 28  | RFD---DPKVELELILQNKPVVILGSDLVKS-----        | T-EKWDLEY-LEKNMGSDSF  |
| <i>C. pallens</i>       | 29  | DCN---DPNVDI LSSNRPVVIITGANLVNT-----        | A-NKWNLEY-LEKNMGNSDF  |
| <i>Z. nevadensis</i>    | 26  | SVK---DPKVDEFIADNKPVVITDTRLVAS-----         | A-ERWDLDY-LEQNMNGDGF  |
| <i>T. commodus</i>      | 51  | HAS---DPRVDELISENKPVVITGTDLVSS-----         | A-MLWDLEY-LEARNMNGDXY |





|                         |     |                                                                 |
|-------------------------|-----|-----------------------------------------------------------------|
| <i>P. brassicae</i>     | 108 | -----TGRHYLLYGEPLP-----                                         |
| <i>E. huxleyi</i>       | 433 | -----AGDSAERLYLQ-ETMSGH--PELAAE                                 |
| <i>B. natans</i>        | 209 | -----EDGNKGRSGLLYLQ-ESLSGH--SEFSSE                              |
| <i>G. theta</i>         | 107 | -----QSHAARRHYLQ-QLVVTGMGERILLDD                                |
| <i>Chrysochromulina</i> | 272 | ----PAE--GVDSKDS--AAGD--GGDAAGGDASSSQRYLYLQ-TALVDVGVGAEMMA      |
| <i>C. owczarzaki</i>    | 166 | AAAVAPADAAAAPDSNSQQPPAASDDSAARTASQFGIHSQDVVYLYLQ-QGLSNSVGLKIVES |
| <i>O. cincta</i>        | 167 | -----RSQERYLYLQ-QPLNNTVGPQIASD                                  |
| <i>S. rosetta</i>       | 111 | -----MRSKDKFYLYLQ-QGLNDTVGPTIVKD                                |
| <i>L. anatina</i>       | 132 | -----KKGSEKNLYLQ-QTLNDAVGVKRRIVD                                |
| <i>C. gigas</i>         | 114 | -----KPGKDKVLYLQ-QALNEGVGKRRIVAD                                |
| <i>L. gigantea</i>      | 127 | -----KKGDKIYLYLQ-QALNDSVGSLSLVD                                 |
| <i>A. queenslandica</i> | 119 | -----EGRTDEYLYYQ-DALTDTVGSGIKHD                                 |
| <i>A. aurita</i>        | 128 | -----KEDDKIYLYLQ-QMLTNRVKDKVVTD                                 |
| <i>C. intestinalis</i>  | 118 | -----ARTKEKLYLQ-QTLNDSVGTNIIVTD                                 |
| <i>N. vectensis</i>     | 120 | -----DPTMARAAGNLRFYLYLQ-QMLNDQVGRNIVAD                          |
| <i>A. millepora</i>     | 125 | -----KASDSRVLYLQ-QMLDDSVGKNIIVKD                                |
| <i>S. purpuratus</i>    | 131 | -----KGCYDKVLYLQ-QALNDSVGPSIVED                                 |
| <i>O. bimaculoides</i>  | 113 | -----QCSKKQLYLQ-QPLTEGVGDKIVQD                                  |
| <i>D. citri</i>         | 125 | -----KEGDERLYLQ-QVLDSVVGQPOLVQD                                 |
| <i>T. cancrivormis</i>  | 120 | -----KIGHLRYLYLQ-QALSSVTGEGIVLD                                 |
| <i>C. teleta</i>        | 120 | -----EQRRFYLYLQ-QPLNDTVGPQVVKD                                  |
| <i>A. pisum</i>         | 113 | -----KKGDSRYLYLQ-QVLNNSISQRIIVSD                                |
| <i>H. sapiens</i>       | 136 | -----QQRGGEERYLYLQ-QTLNDTVGRKIVMD                               |
| <i>B. floridae</i>      | 116 | -----AETE-GKRVLYLQ-QTLNDTVGKNIIVD                               |
| <i>F. occidentalis</i>  | 130 | -----KGDDELYLYLQ-QALSSVTSAGVVQD                                 |
| <i>C. aquilonaris</i>   | 116 | -----KPGKERYLYLQ-QALNNTVGGIVQD                                  |
| <i>I. scapularis</i>    | 123 | -----G-HNKYYLYLQ-QMLNETVQSSIMLD                                 |
| <i>A. geniculata</i>    | 113 | -----ELGGRRYLYLQ-QPLNDTVGKNIIVD                                 |
| <i>C. sculpturatus</i>  | 113 | -----QANDRRYLYLQ-QPLNDTVGKNIIVKD                                |
| <i>S. olivacea</i>      | 126 | -----KPGDERVLYLQ-QGLNNTVQQAIVMD                                 |
| <i>T. castaneum</i>     | 124 | -----KKGDERLYLQ-QSLTTTVGNIVED                                   |
| <i>S. maritima</i>      | 117 | -----KSGDDRYLYLQ-QTLNSTVGVQAIIVD                                |
| <i>E. danica</i>        | 126 | -----KAGNDRPYLYLQ-QALNSTAGPSIVED                                |
| <i>R. prolixus</i>      | 120 | -----KKGNDKLYLYLQ-QTLNDTVGPSIVRD                                |
| <i>P. humanus</i>       | 123 | -----KKGDDRYLYLQ-QLLNNTVGPQIVDD                                 |
| <i>C. pallens</i>       | 127 | -----KRGDDRYLYLQ-QALNNTVGSIVQD                                  |
| <i>Z. nevadensis</i>    | 121 | -----RRGEERYLYLQ-QALNNTVGPQIVQD                                 |
| <i>T. commodus</i>      | 146 | -----KRGEERYLYLQ-QALNNTVGPSIVQD                                 |



|                         |     |                                                                |
|-------------------------|-----|----------------------------------------------------------------|
| <i>P. brassicae</i>     | 121 | --SALWRSLLPDMERVLGSTAQLTSSLLWMLDATCSLFLYEMCHGLLLQMAQGRFIMFF    |
| <i>E. huxleyi</i>       | 456 | FRSNNWFPELLQNSNRH-RWGLPDSNELFIQMGAEDAHYDEQRHNLFFQVGRGRQQLLFF   |
| <i>B. natans</i>        | 236 | FASNNWNLRLRIVQKY-GWCTPDRNLLIGMGGATIPAHYDEQENMFQMRGRREYVLYWF    |
| <i>G. theta</i>         | 132 | FKHYVDGTVYGWKAQL-GFGDLTNNLLLVGTTGHVTPAHYDEQHNFFCOLQGRQVMLFS    |
| <i>Chrysochromulina</i> | 319 | FRAFDDWEGVLATQRL-GWGSLSNLLLVGQKQNTFCHYDEQONLFAQLHGARRVILFS     |
| <i>C. owczarzaki</i>    | 225 | FLQFNWKLLELQDA-NWSDLTNNLLLVSMAGAVTFAHYDEQENLFAQVGRKRCVLF       |
| <i>O. cincta</i>        | 190 | FIQFNWSAAEHKREF-NWGPLTSNLLLIQKQGNITFCHYDEQONLFCPLRGRKRILLFN    |
| <i>S. rosetta</i>       | 136 | FVGFNWTWITDVVKAL-NWGHLLTNMLFVSMPLHVFCHYDEQENFFAQVGRTRVILLFH    |
| <i>L. anatina</i>       | 156 | FLGFNWDWINKQNGN-NWGPLTANLLLIQEGNYPFVHYDEQHNLFQVQVGGCRILFF      |
| <i>C. gigas</i>         | 138 | FLGFNWSWVTEQQKKN-KFGALTSNLLLIQMEGNVTFAHYDEQENFFAQIRGYKRIFLFF   |
| <i>L. gigantea</i>      | 151 | FIKFNWSWATEQQKKY-KWGALTSNLLLVGMDGVIIPAHYDEQONFFAQIGGRFRILLFD   |
| <i>A. queenslandica</i> | 144 | FVHFNWHWVSERKKRY-NWQPLTSNLLLIQSPGNITFCHYDEQHNFFQVGRGRKILLFA    |
| <i>A. aurita</i>        | 152 | FLSNFNWGLVGOQRY-NWGPLTSNLLLVSQPGNITFLHYDEQENFFAQASGGRKMLFF     |
| <i>C. intestinalis</i>  | 142 | FLQFNWDVWVKCQAAY-GWGSLSNLLLIQLEGNITFVHYDEQENFFAQISGHRKILLFS    |
| <i>N. vectensis</i>     | 149 | FLGFNWAWLNTMOKEM-DWGPLTSNLLLIQIPGNITFVHYDEQONLFCQVTCGRVLLFH    |
| <i>A. millepora</i>     | 149 | FLEFKWQWLTQMOKKM-NWGS LTSNLLLIQIPGNITFVHYDEQONFFGOLTCGRVLLFH   |
| <i>S. purpuratus</i>    | 155 | FVRFNWNWVTDYQKKN-SWGPLTSNLLLVSMEGNVTFAHYDEQENFFAQVGRVGRFIMFF   |
| <i>O. bimaculoides</i>  | 137 | FVSNFNWRWISMQQKEN-NWGPLSNLLLVGMAGNITFVHYDEQONFFAQLRGVKRCILLFA  |
| <i>D. citri</i>         | 149 | FLHFNWDWAKNKQKIH-GWGPLTSNLLLIQAGNVTFCHYDEQONLFGVIRGFRKILLFF    |
| <i>T. cancrivormis</i>  | 144 | YVFNWFWIVNIQKRN-GWGS LTSNLLLIQSGGNITFCHYDEQHNLFQVGRGRKILLFF    |
| <i>C. teleta</i>        | 142 | FLQFNWDFAKEQKRN-GWGPLTSNLLLIQAGNVTFCHYDEQENLFAQVGRVGRVILLFF    |
| <i>A. pisum</i>         | 137 | FVFMFNWDWIMSKQKVC-KWGS LTSNLLLIQEGNVTFCYDEQONMFASIRGYKRIFLFF   |
| <i>H. sapiens</i>       | 162 | FLGFNWNWINKQKGR-GWGQ LTSNLLLIQMEGNVTFAHYDEQONFFAQIRGYKRCILFF   |
| <i>B. floridae</i>      | 141 | FLQFNWDWINKQKQKQ-NWGH LTSNLLLIQAGNVTFVHYDEQONFFAQVGRGRKILLFA   |
| <i>F. occidentalis</i>  | 154 | FIRFRWDVVTAKQKLH-NWGKLTYNLLLVGLEGNVTFCHYDEQENLFAQIHGHRKILLFF   |
| <i>C. aquilonaris</i>   | 140 | FLGFNWPWINGQKQKH-GWGPLSNLLLVGLGGNVTFAHYDEQENFFAQVGRGRKILLFF    |
| <i>I. scapularis</i>    | 146 | FLRFNWDVWNRQKQHN-GWGPLTSNLLLVGTGGNVTFAHYDEQONFFAHLRGRKILLFS    |
| <i>A. geniculata</i>    | 137 | FLDFNWKWICEIQKQN-NWGPLTSNLLLVSSAGNVTFAHYDEQONIFAQIRGRKILLFF    |
| <i>C. sculpturatus</i>  | 137 | FLDFNWNWISGQQQNH-NWGPLTSNLLLIQSEGSVTFAHYDEQONFFAQIYGFRRKILLFC  |
| <i>S. olivacea</i>      | 150 | FLQFNWQWLNMQKKN-NWGPLTSNLLLVGMEGNVTFVHYDEQONFFSOLVGYGRKILLFA   |
| <i>T. castaneum</i>     | 148 | FVKFDWDVYVNGKQTKH-NWGPLTSNLLFIAMEGNVTFCHYDEQENFFAQVQVGRKILLFF  |
| <i>S. maritima</i>      | 141 | FVRFNWNWANGRQKKN-NWGS LTSNLLLIQATEGNITFCHYDEQONFFAQVGRGRVILLFF |
| <i>E. danica</i>        | 150 | FRFNWDVWNLQKKH-TWGPLTSNLLLIAMEGNVTFCHYDEQONIFAQVGYGRKILLFH     |
| <i>R. prolixus</i>      | 144 | FLGFKWDWINGIQKKN-NWGPLTSNLLLIQMEGNVTFCHYDEQENLFAQVGRGRKILLFF   |
| <i>P. humanus</i>       | 147 | FLHFKNWDLNSIQKLS-NWGPLTSNLLLIQMEGNVTFCHYDEQONLFAQITGYKRCILFF   |
| <i>C. pallens</i>       | 151 | FRGFNWSWVNVKQKAN-SWGPLTSNLLLIQMEGNVTFCHYDEQONFFAEVGRGRKILLFF   |
| <i>Z. nevadensis</i>    | 145 | FLNFRWEDWINSKQKMH-SWGPLTSNLLLIQMEGNVTFCHYDEQONFFAEVGRGRKILLFF  |
| <i>T. commodus</i>      | 170 | FLNFRWEDWINKQKAN-NWGPLTSNLLLIQMEGNVTFCHYDEQONFFAEVGRGRKILLFF   |

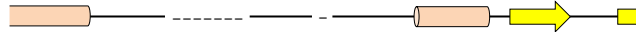

|                         |     |                                                                |
|-------------------------|-----|----------------------------------------------------------------|
| <i>P. brassicae</i>     | 179 | PDGIPDAYMHPVGHARMGLVSDDDRQSQINIDICHPDLAAFPAPFAGLRGTQGVVPPGQALV |
| <i>E. huxleyi</i>       | 515 | FVEYEKLYPPPVTHP-----CDRQSMV-DVARPDLEAFPATASQYTTLPADLVE         |
| <i>B. natans</i>        | 295 | PGDNQGMYAFCNHA-----CDRQAMV-NPNDPLHRFPFYLRHARPHYAVLQPGDLLY      |
| <i>G. theta</i>         | 191 | PAENGMKYPFPLLHA-----CDRQSMV-P--SHDRMLFFNFDRASGYEAIIVHPGEMLY    |
| <i>Chrysochromulina</i> | 378 | FADFGCLYPPPMHHP-----CDRQSQV-DLYAPDLSRFPFRFARPLEAAILQPGEVLY     |
| <i>C. owczarzaki</i>    | 284 | PDRFPCLYPPVHHP-----CDRQSQV-DFDNPDLARFPFRFSLHGWECILPEVGEVLY     |
| <i>O. cincta</i>        | 249 | PENFPYLYPPVHHP-----NDRQSQV-NLDNPDYGRFPKFAFAMARGVQATVGPGEILY    |
| <i>S. rosetta</i>       | 195 | PDNFRCLYPPRYGHP-----CDRQSQV-DFDNPDYERFPKFKDARGLEAILRPGDVLY     |
| <i>L. anatina</i>       | 215 | FSQFECLYPPVYHP-----CDRQSQV-DLRAPDFDRFPKLRKLGVEVIVKPGDVLY       |
| <i>C. gigas</i>         | 197 | PDQFKCMYPYPTYPH-----CDRQSQV-DFDNPDYKRFPKFKDVKGYETVVVGGVDLVE    |
| <i>L. gigantea</i>      | 210 | FSMFECLYPPVYHP-----HDRQSQV-DFDNPDHERFPFRNLYGQEAIVGPGVDLY       |
| <i>A. queenslandica</i> | 203 | PDOYDKLYPPVAHP-----CDRQSQV-DFDSDFERFPKFKIEIGYECILSPGDVLY       |
| <i>A. aurita</i>        | 211 | FSQFKCFYPPFYHHP-----CDRQSQV-DFDNPDHGSFPLFKKAVGREVIVGPGDVLY     |
| <i>C. intestinalis</i>  | 201 | PDQFDCLYPPVAHP-----CDRQSQV-NIANPDYKRFPRFRNAHATEAIVGPGDVLY      |
| <i>N. vectensis</i>     | 208 | PDKFKCLYPPVHHP-----CDRQSQV-DFDPCDYIRFPFLKEICGMEAMVKGPGDVLY     |
| <i>A. millepora</i>     | 208 | PDQFKCLYPPFLYHP-----CDRQSQV-DFDNPDFKRFPKLKLKLGVEVIVGPGDVLY     |
| <i>S. purpuratus</i>    | 214 | FSQFDRLYPPVHHP-----NDRQSQV-NEDDPDFERFPKFRNAKAVEAVVGPGEVLY      |
| <i>O. bimaculoides</i>  | 196 | PDQFKSLYPPVYHP-----HDRQSQV-NLENPNLEKRFKVLRLKGFATLHPGDVLY       |
| <i>D. citri</i>         | 208 | PEQFDCLYPPVSHHP-----HDRQSQV-DFENPDLQRFPRFREAKGMEAVVGPGEVLY     |
| <i>T. cancriformis</i>  | 203 | PEQFNLYHPFFPHHP-----HDRQSQV-DFDEPDYIRFPNFHFKARGLFVAVVGPGEVLY   |
| <i>C. teleta</i>        | 201 | PEQFSCLYPPVHHP-----HDRQSQV-DFENPDYERFPFLKDVACQEAIVGPGDVLY      |
| <i>A. pisum</i>         | 196 | FSEFECLYPPVHHP-----YDRQSQV-DFDNPDYIKRFPKFKEACGYEIVVGPGEVLY     |
| <i>H. sapiens</i>       | 221 | PDQFECLYPPVHHP-----CDRQSQV-DFDNPDYERFPFRQNVVGYETVVVGPGEVLY     |
| <i>B. floridae</i>      | 200 | PEQTECLYPPVHHP-----CDRQSQV-DFDNPDYNRFPKFRYASGLEAVVGPGEVLY      |
| <i>F. occidentalis</i>  | 213 | PEQFGCLYPPVHHP-----HDRQSQV-DLDNPDYDRFPKFRDLHGVAVAVVGPGEVLY     |
| <i>C. aquilonaris</i>   | 199 | PEQFDCLYPPVYHP-----HDRQSQV-DFENPDLSRYPKFSEASGMETILSPGEVLY      |
| <i>I. scapularis</i>    | 205 | PDQYGCLYPPVWHP-----HDRQSQV-DFSDPDLRSRFPFAHLRGWETVLPGEVLY       |
| <i>A. geniculata</i>    | 196 | PEQYECFYPPVHHP-----HDRQSQV-DFENPDYIKRFKFRDAHGVEAILGPGDVLY      |
| <i>C. sculpturatus</i>  | 196 | PEMYECLYPPVWHP-----HDRQSQV-DFDNPDDEKFPFRHEIRQODAIIPGVDLY       |
| <i>S. olivacea</i>      | 209 | PEHYERLYPPVYHP-----HDRQSQV-DFDPPDMEKFPGLKHLQGMEAVVGPGEVLY      |
| <i>T. castaneum</i>     | 207 | FSQFECLYPPVHHP-----HDRQSMV-DFERPDYKRFKFKNVKGWAVEAVVGPGEVLY     |
| <i>S. maritima</i>      | 200 | PEQFECLYPPVYHP-----HDRQSQV-DFDNPDYERFPKFRIEAMEAVVGPGEVLY       |
| <i>E. danica</i>        | 209 | PDQFDCLYPPFIHHP-----HDRQSQV-DFENPDYERFPKFRKAKAMQAVVGPGEVLY     |
| <i>R. prolixus</i>      | 203 | PEQFDCLYPPVHHP-----HDRQSQV-DFDEPDYKRFKFKSEAKGEEAIVGPGEVLY      |
| <i>P. humanus</i>       | 206 | PEQFECLYPPVYHP-----HDRQSQV-DFENPDYKRFKFKSQQVQGEIVLPGEVLY       |
| <i>C. pallens</i>       | 210 | PEQFECLYPPVYHP-----HDRQSQV-DFEKPDYKRFKFRREARGMQAVIIPGVDLY      |
| <i>Z. nevadensis</i>    | 204 | PEQFECFYPPVYHP-----HDRQSQV-DFERPDYTRFPKFRREARGQEAIVGPGDVLY     |
| <i>T. commodus</i>      | 229 | PEQFECFYPPVYHP-----HDRQSQV-DFDRPDYTRFPKFRREARGQEAIVGPGDVLY     |

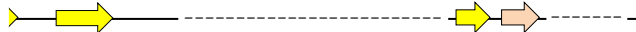

|                         |     |                                                           |
|-------------------------|-----|-----------------------------------------------------------|
| <i>P. brassicae</i>     | 239 | IPYGMWQHIEAGPGL-----SISVSTSVHA---ARTCG                    |
| <i>E. huxleyi</i>       | 567 | LPYGFWHLRNDDA-----LSSLSFWLSL-----T                        |
| <i>B. natans</i>        | 347 | LPYGMWHLRLNDP-----LAISITFWSKQ-----QK                      |
| <i>G. theta</i>         | 241 | IPSYWVHVINLE-----ETVSLTFWFK-----CP                        |
| <i>Chrysochromulina</i> | 430 | LPOYWHHINLDE-----ACVSLNFWFK-----DC                        |
| <i>C. owczarzaki</i>    | 336 | IPAYWVHVESLT-----DSVSVNFWYL-----VG                        |
| <i>O. cincta</i>        | 301 | TIPIHWWHVINLD-----DTIAINFWHK-----GG                       |
| <i>S. rosetta</i>       | 247 | IPRCWVHLVRSLDE-----LSVSVNFWYMS-----PP                     |
| <i>L. anatina</i>       | 267 | IPMYWFHVESLIIGSG-----ITTSITFWYK-----SG                    |
| <i>C. gigas</i>         | 249 | IPMYWVHVESLPDHC-----HTISVTFWYK-----AG                     |
| <i>L. gigantea</i>      | 262 | IPYIYWHHVESVPHNG-----MTVSVNFWYK-----SG                    |
| <i>A. queenslandica</i> | 255 | IPMYWVHTIETSPGE-----LSSITTFWYR-----GG                     |
| <i>A. aurita</i>        | 263 | IPVYWVHYIESVMDE-----PTISINFWYKA-----AA                    |
| <i>C. intestinalis</i>  | 253 | IPMYWVHVESLSSSDAMDVSHPHSLQDSASIDDVMEGIPPTIISVNFWYR-----GT |
| <i>N. vectensis</i>     | 260 | IPMYWVHYVESTLNGG-----ITTSVNFWYK-----AG                    |
| <i>A. millepora</i>     | 260 | IPMYWVHVESLTMNSG-----ITTSVNFWFK-----AG                    |
| <i>S. purpuratus</i>    | 266 | IPMYWVHVESLHGG-----VTVSVTFWFK-----AG                      |
| <i>O. bimaculoides</i>  | 248 | IPYIYWHHVESLPQKG-----VTISINFWYK-----NS                    |
| <i>D. citri</i>         | 260 | IPLYWVHVIESKQKED-----YTVSLNFWYK-----TK                    |
| <i>T. cancriformis</i>  | 255 | IPAYWVHYVESLPGEE-----CNISVTFWYK-----AG                    |
| <i>C. teleta</i>        | 253 | IPMYWFHVESLDDGG-----LTSVTFWYK-----AP                      |
| <i>A. pisum</i>         | 248 | IPMYWFHVESLMHGG-----CTVSVNFWFK-----AG                     |
| <i>H. sapiens</i>       | 273 | IPMYWVHVIESLNGG-----ITITVNFWYK-----GA                     |
| <i>B. floridae</i>      | 252 | IPMYWVHVIESLLEGG-----YTVSVNFWYK-----AG                    |
| <i>F. occidentalis</i>  | 265 | IPYIYWHHVIESVKPEK-----YTVSLNFWYK-----AG                   |
| <i>C. aquilonaris</i>   | 251 | IPVYWVHVIESLQQNQ-----YTVSINFWYKTFNFAKQSR-----AG           |
| <i>I. scapularis</i>    | 257 | IPMYWVHVESAPGKD-----YTVSVNFWYK-----AA                     |
| <i>A. geniculata</i>    | 248 | IPMYWVHVESALDGG-----YTVSVNFWYK-----SG                     |
| <i>C. sculpturatus</i>  | 248 | IPMYWVHVESLRLTK-----YTVSVNFWYK-----SG                     |
| <i>S. olivacea</i>      | 261 | IPMYWVHVIESLPHLG-----NTVSVNFWYK-----GG                    |
| <i>T. castaneum</i>     | 259 | IPYIYWHHVIESLRLGG-----PTVTVNFWYK-----GG                   |
| <i>S. maritima</i>      | 252 | IPMYWVHVESLQTGG-----YTVSVNFWYR-----AG                     |
| <i>E. danica</i>        | 261 | IPYIYWHHVIESLMNGG-----NTLSINFWYK-----AA                   |
| <i>R. prolixus</i>      | 255 | IPVYWVHVESLRLGG-----YTVSVNFWYK-----VG                     |
| <i>P. humanus</i>       | 258 | IPYIYWHHVIESLMRGG-----YTVSINFWYK-----AG                   |
| <i>C. pallens</i>       | 262 | IPYIYWHHVESLMRGG-----YTVSINFWYK-----AG                    |
| <i>Z. nevadensis</i>    | 256 | IPYIYWHHVIESLMRGG-----YTVSINFWYK-----AG                   |
| <i>T. commodus</i>      | 281 | IPYIYWHHVIESLMRGG-----YTVSINFWYK-----AG                   |

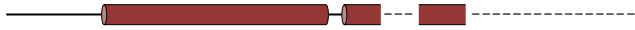

|                  |     |                                                               |
|------------------|-----|---------------------------------------------------------------|
| P. brassicae     | 269 | LPP-----AA--CAGIAGNLL--HDAPSAVRDI---YLR-----                  |
| E. huxleyi       | 593 | K-KERVDPVFSAHDLTLVRRNLEKHMMAARFGAALFPQRMRRLLRLI-DA-GPGGETSDGV |
| B. natans        | 374 | ASLDTLKLPLDQRHLLTVRRNLEEMVFNI FGSESLQN-LAKQLSAKH-SSKPSTKLSEG- |
| G. theta         | 266 | FVG-DLRLPLISQVQRVALRRNIENMFGSMLGNRNELI---SAFLQ-----           |
| Chrysochromulina | 456 | AKPEKVVLPISASQHLAMRRNIEKLVAOKLGATKAQL-VLPLLSASHTDAEQPAESAMPE- |
| C. owczarzaki    | 361 | FP--EIAHPLTYQOKISVMRNIEKMLGEALGDPQTQ---SSLLS-----             |
| O. cincta        | 326 | GSA-FVEYPLQAROKIAMVRNIEKMLLEALQDONEL---KELLH-----             |
| S. rosetta       | 274 | ATAEDIRFPLTASQKVAMMRNIEQMLLTALGSAGEV---SDFLR-----             |
| L. anatina       | 295 | PTG-KIEYPLKPOOKMAMMRNIEKMITALNSSEEV---PFMQ-----               |
| C. gigas         | 277 | PTG-NVVYPLSPOOKVSMRNLEKMIHQALNNTDEI---PEFMQ-----              |
| L. gigantea      | 290 | TEE-KIVYPLKPOOKVAMMRNIEKMTSAINNHEEV---PHLLK-----              |
| A. queenslandica | 282 | FVPSKITYPPLSSQKVAITRNIEKMLHEALQDHNEV---GPLLH-----             |
| A. aurita        | 292 | NISKEIPYPLRMDQKVAIMRNIEKLLGDALGDPPEV---NSLLN-----             |
| C. intestinalis  | 306 | LPLPDVIQYPLSPOOKVSMRNIEKMLAALGDAEKV---GELLR-----              |
| N. vectensis     | 288 | QTPSEISFPLSSQKIAMRNIEKMLGALGSHTEV---GPLLN-----                |
| A. millepora     | 288 | PTPSQITHPLTAQOKVAMRNIEKMLGALGDPHEV---GPLLN-----               |
| S. purpuratus    | 294 | AGPKQVEYPLTPOQKVSITRNIEKMLFEVLKDPKEV---ASLFH-----             |
| O. bimaculoides  | 276 | CQQ-TVTYPLAASQKIAMRNIEKMTDALGDIINEV---APFMR-----              |
| D. citri         | 289 | PTG-DIEYPLKQHKVAILRNIEKMAEALQNOEEV---SHLMR-----               |
| T. cancriformis  | 283 | PTG-VVKYPLKGYQKVAIMRNIEKILVEALQDPQEV---GPLLRL-----            |
| C. teleta        | 281 | FVG-KVEYPLKPOOKVAMMRNIEKMITALNDQHEV---APFMR-----              |
| A. pisum         | 276 | SVE-KIEYPLLDHKQVMIMRNIEKMLAEALHDPNEV---GNMLN-----             |
| H. sapiens       | 301 | PTPKRIEYPLKQHKVAIMRNIEKMLGALGNPQEV---GPLLN-----               |
| B. floridae      | 280 | PTPRNIVYPLKPVQKMAIMRNIEKMLAEALGDYREV---GPLLN-----             |
| F. occidentalis  | 293 | FVG-QVEYPLKGYQKVAIMRNIEKMLAEAMQDPEV---GALLR-----              |
| C. aquilonaris   | 286 | PTG-DIVYPLQGYQKVAIMRNIEKMLLEALRDPEEV---GPLMR-----             |
| I. scapularis    | 285 | PVD-KVIYPRMGHKMAIMRNIEKMLVEALRDVNEV---GPLLRL-----             |
| A. geniculata    | 276 | PTG-KVKYPLQASQKMAIMRNIEKMLVEALKDVNEV---GPLLRL-----            |
| C. sculpturatus  | 276 | PTG-KIKYPLNGHKMAIMRNIEKMLVEALKDVNEV---GPLLRL-----             |
| S. olivacea      | 289 | PTE-KIEYPLKPRQKLAIMRNIEKMLLEALREPAEV---GPLLRL-----            |
| T. castaneum     | 287 | PS--TLEYPLKDHQKVSITRNIEKMLLEVLQDPKEV---GPLLRL-----            |
| S. maritima      | 280 | PTG-KIEYPLKQKVAIRNIEKMLVSGALEKPEEV---GPLLRL-----              |
| E. danica        | 289 | PPP-PISYPLLGHKIAMRNIEKMLAEALQDQKEV---GPLLRL-----              |
| R. prolixus      | 283 | PTG-HITYPLKGYQKVAIMRNIEKMLVEALKDTEEV---GPLLRL-----            |
| P. humanus       | 286 | PTG-FTYPLKSRQKVAIMRNIEKMLINALADPREV---GPLFR-----              |
| C. pallens       | 290 | PTG-EIVYPLKQHKVAIMRNIEKMLLEALQDPREV---GPLLRL-----             |
| Z. nevadensis    | 284 | PTG-QIVYPLKDHQKVAIMRNIEKMLVEALQDPHEV---GPLLRL-----            |
| T. commodus      | 309 | PTG-QIVYPLQGHQKVAIMRNIEKMLVEALQDPQEL---GPLLRL-----            |

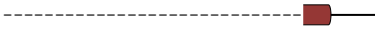

|                  |     |                                                   |
|------------------|-----|---------------------------------------------------|
| P. brassicae     | 296 | -----RMQW-----                                    |
| E. huxleyi       | 650 | VGEVLAEARTLLGAVQVADPEKQDEFLLRMLRVRFEGEWQAHV---    |
| B. natans        | 431 | NSKVKEFMVNCLSNF--MGRTQAEPLILDMLGGRYCNDEKWIQPN---  |
| G. theta         | 306 | -----EIASNRFNLPVRM-----                           |
| Chrysochromulina | 514 | VGALREEVTRLLTHV--MPAADVPALWCELVEGRFRLAHQETGQPI--- |
| C. owczarzaki    | 400 | -----DLVLGRYTH-----                               |
| O. cincta        | 366 | -----WIVDGRY-----                                 |
| S. rosetta       | 315 | -----MLVSGRYTDTANHTFRQLEM-----                    |
| L. anatina       | 335 | -----NMVLGRYT-----                                |
| C. gigas         | 317 | -----NMVLGRYTDPPA-----                            |
| L. gigantea      | 330 | -----TMVLGRYT-----                                |
| A. queenslandica | 323 | -----MTCDGRY-----                                 |
| A. aurita        | 333 | -----MTVNGRYPADRKYFEFDE-----                      |
| C. intestinalis  | 347 | -----TMVEGRYTO-----                               |
| N. vectensis     | 329 | -----LMVNGRYNLPETESKKGETHSSHS-----                |
| A. millepora     | 329 | -----CMVNGRYTENNDEKDYGADVLS-----                  |
| S. purpuratus    | 335 | -----LIVDGRYDLPADPMPPPSS-----                     |
| O. bimaculoides  | 316 | -----TMVLGRYT-----                                |
| D. citri         | 329 | -----ALVLGRYTE-----                               |
| T. cancriformis  | 323 | -----AMVLGRYTOTDAQIGA-----                        |
| C. teleta        | 321 | -----NMVLGRYTSDDL-----                            |
| A. pisum         | 316 | -----TIVLGRYTSDTN-----                            |
| H. sapiens       | 342 | -----TMIKGRYN-----                                |
| B. floridae      | 321 | -----TMIQGRYTLMDMTEVNGNKVLYTD-----                |
| F. occidentalis  | 333 | -----TMVQGRF-----                                 |
| C. aquilonaris   | 326 | -----TMVLGRYTEGDQSV-----                          |
| I. scapularis    | 325 | -----AMVLGRYT-----                                |
| A. geniculata    | 316 | -----SMVIGRYT-----                                |
| C. sculpturatus  | 316 | -----AMVLGRYT-----                                |
| S. olivacea      | 329 | -----SLVLGRYTGAEADRQEGALLSAATPHTN-----            |
| T. castaneum     | 326 | -----SMVLGRYTE-----                               |
| S. maritima      | 320 | -----AMVLGRYT-----                                |
| E. danica        | 329 | -----ALVLGRYT-----                                |
| R. prolixus      | 323 | -----AIVLGRYTE-----                               |
| P. humanus       | 326 | -----ALVLGRYAEASSKIDDNN-----                      |
| C. pallens       | 330 | -----TEVLGRYTE-----                               |
| Z. nevadensis    | 324 | -----ALVLGRYTD-----                               |
| T. commodus      | 349 | -----ALVLGRYT-----                                |
